# Supplementary material
Source: PubMed Central journal article supplement (PMC11383816)
Supplement: PBI-20-538-s001.pdf [file PBI-20-538-s001.pdf]

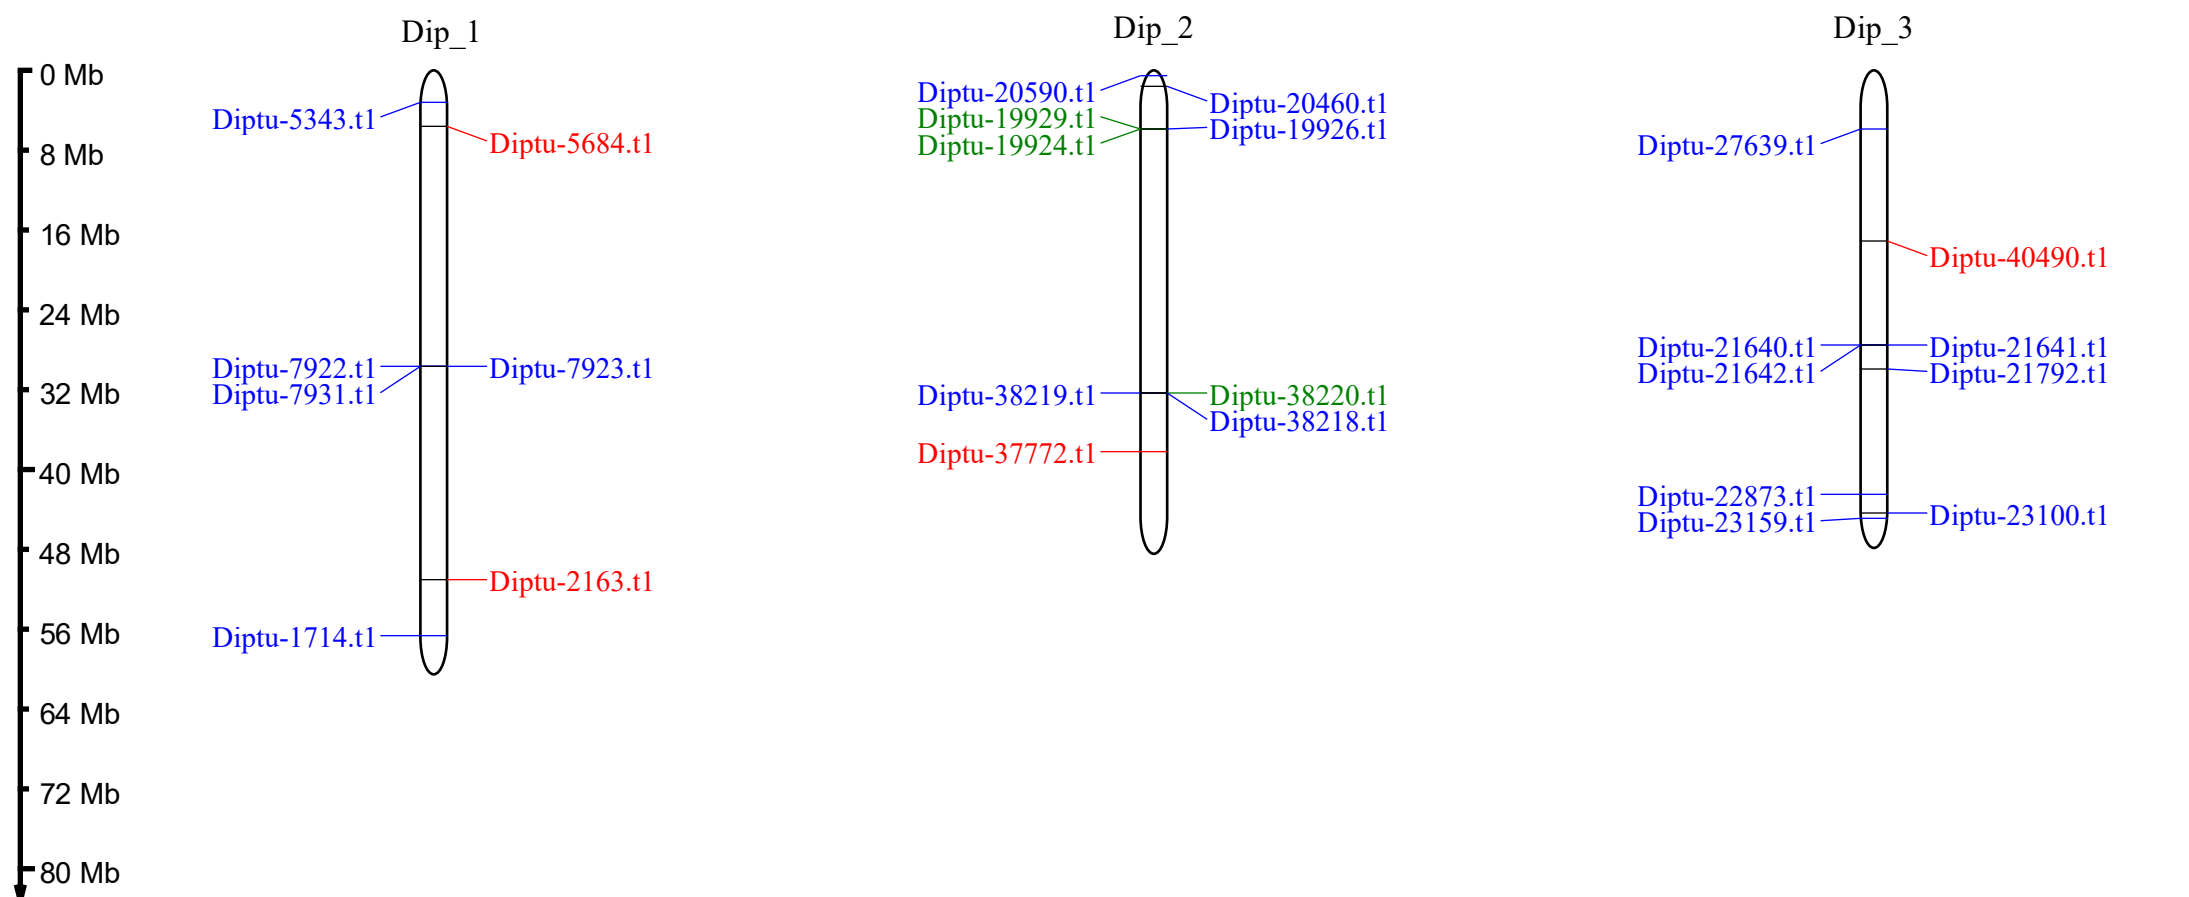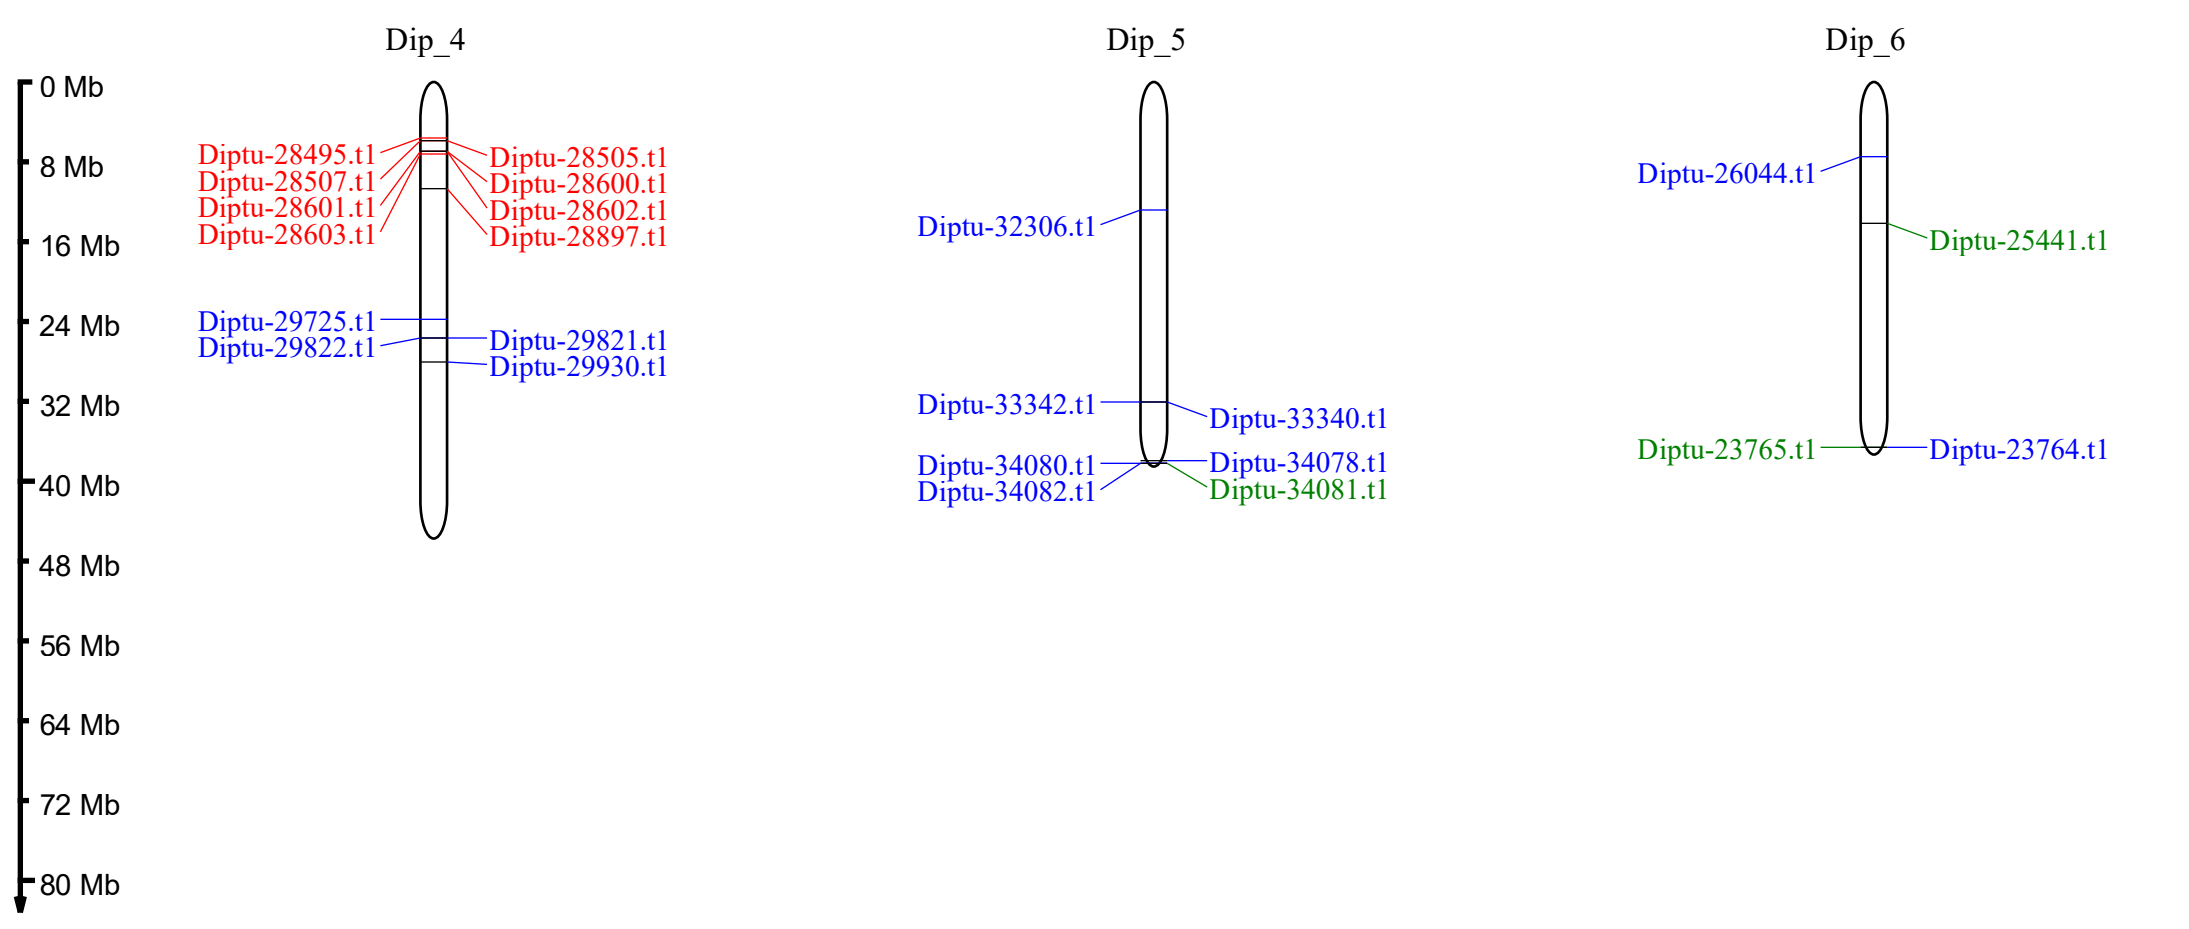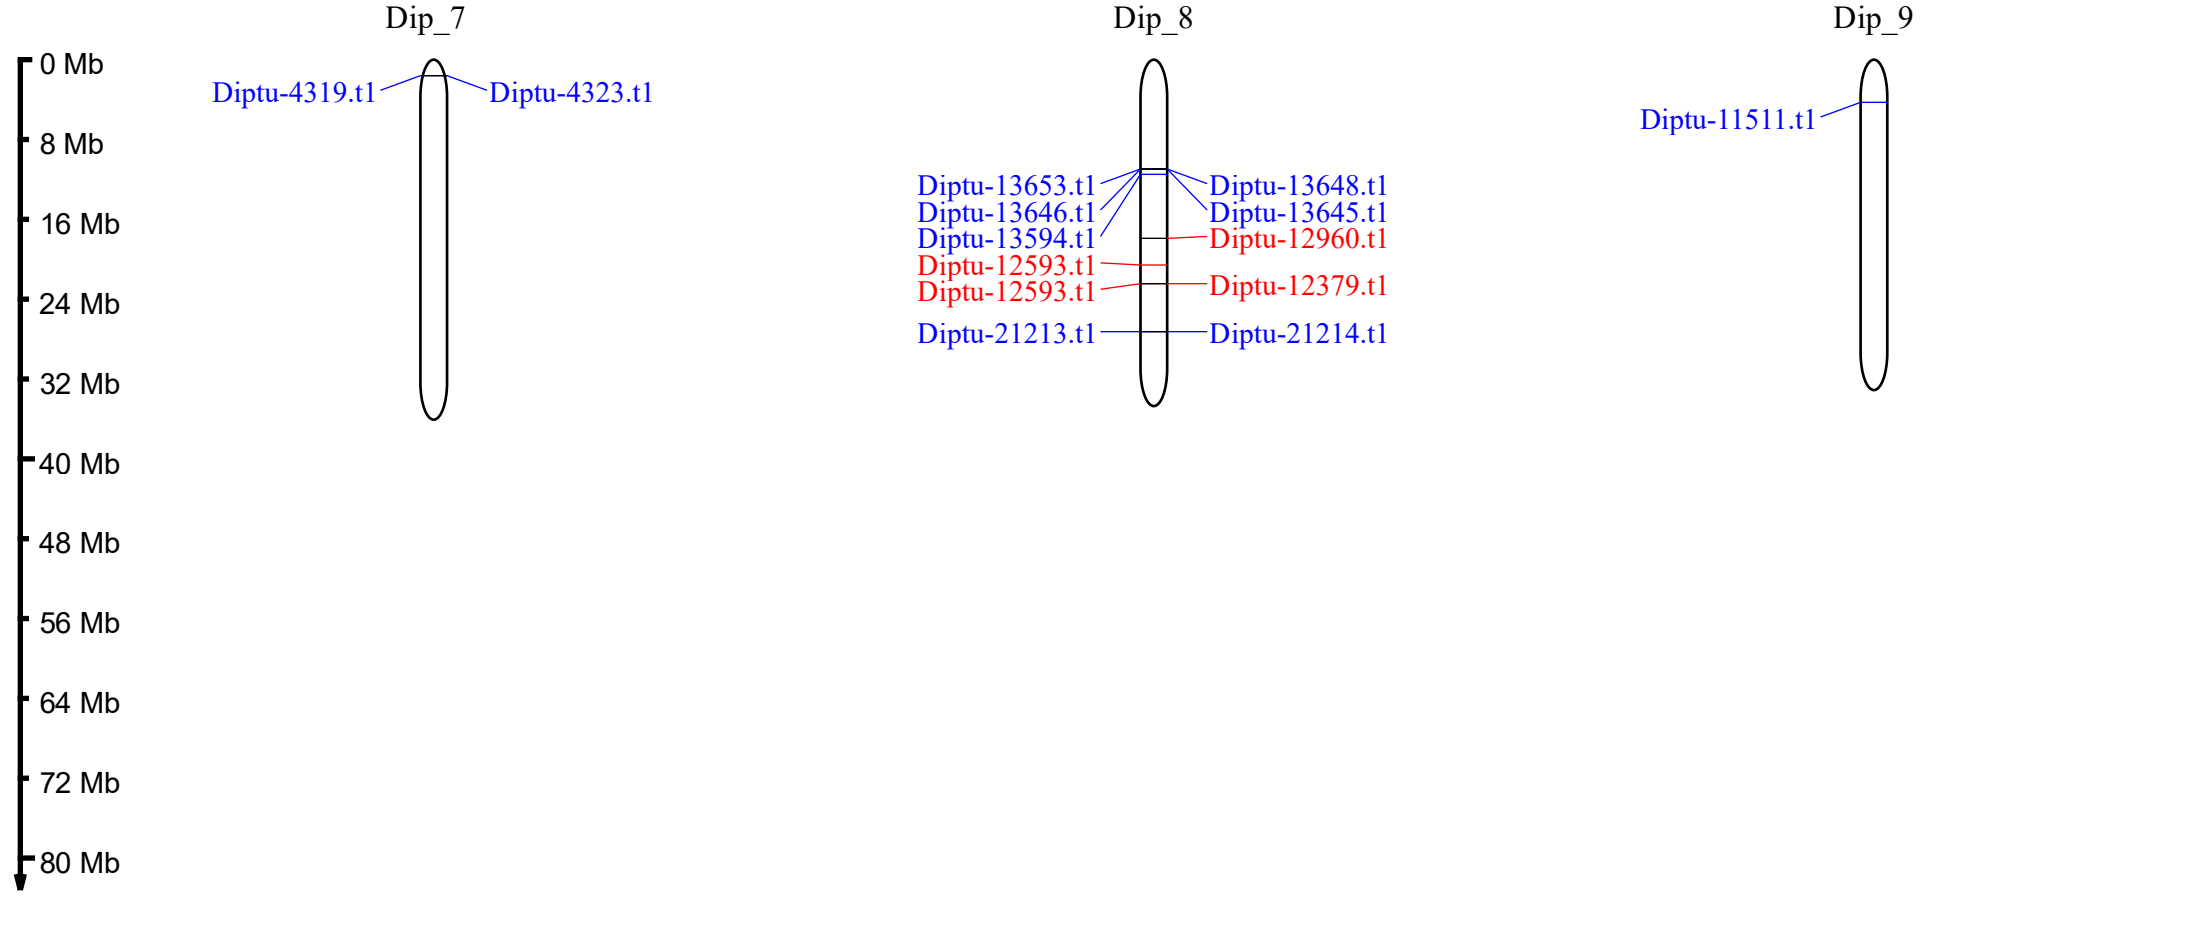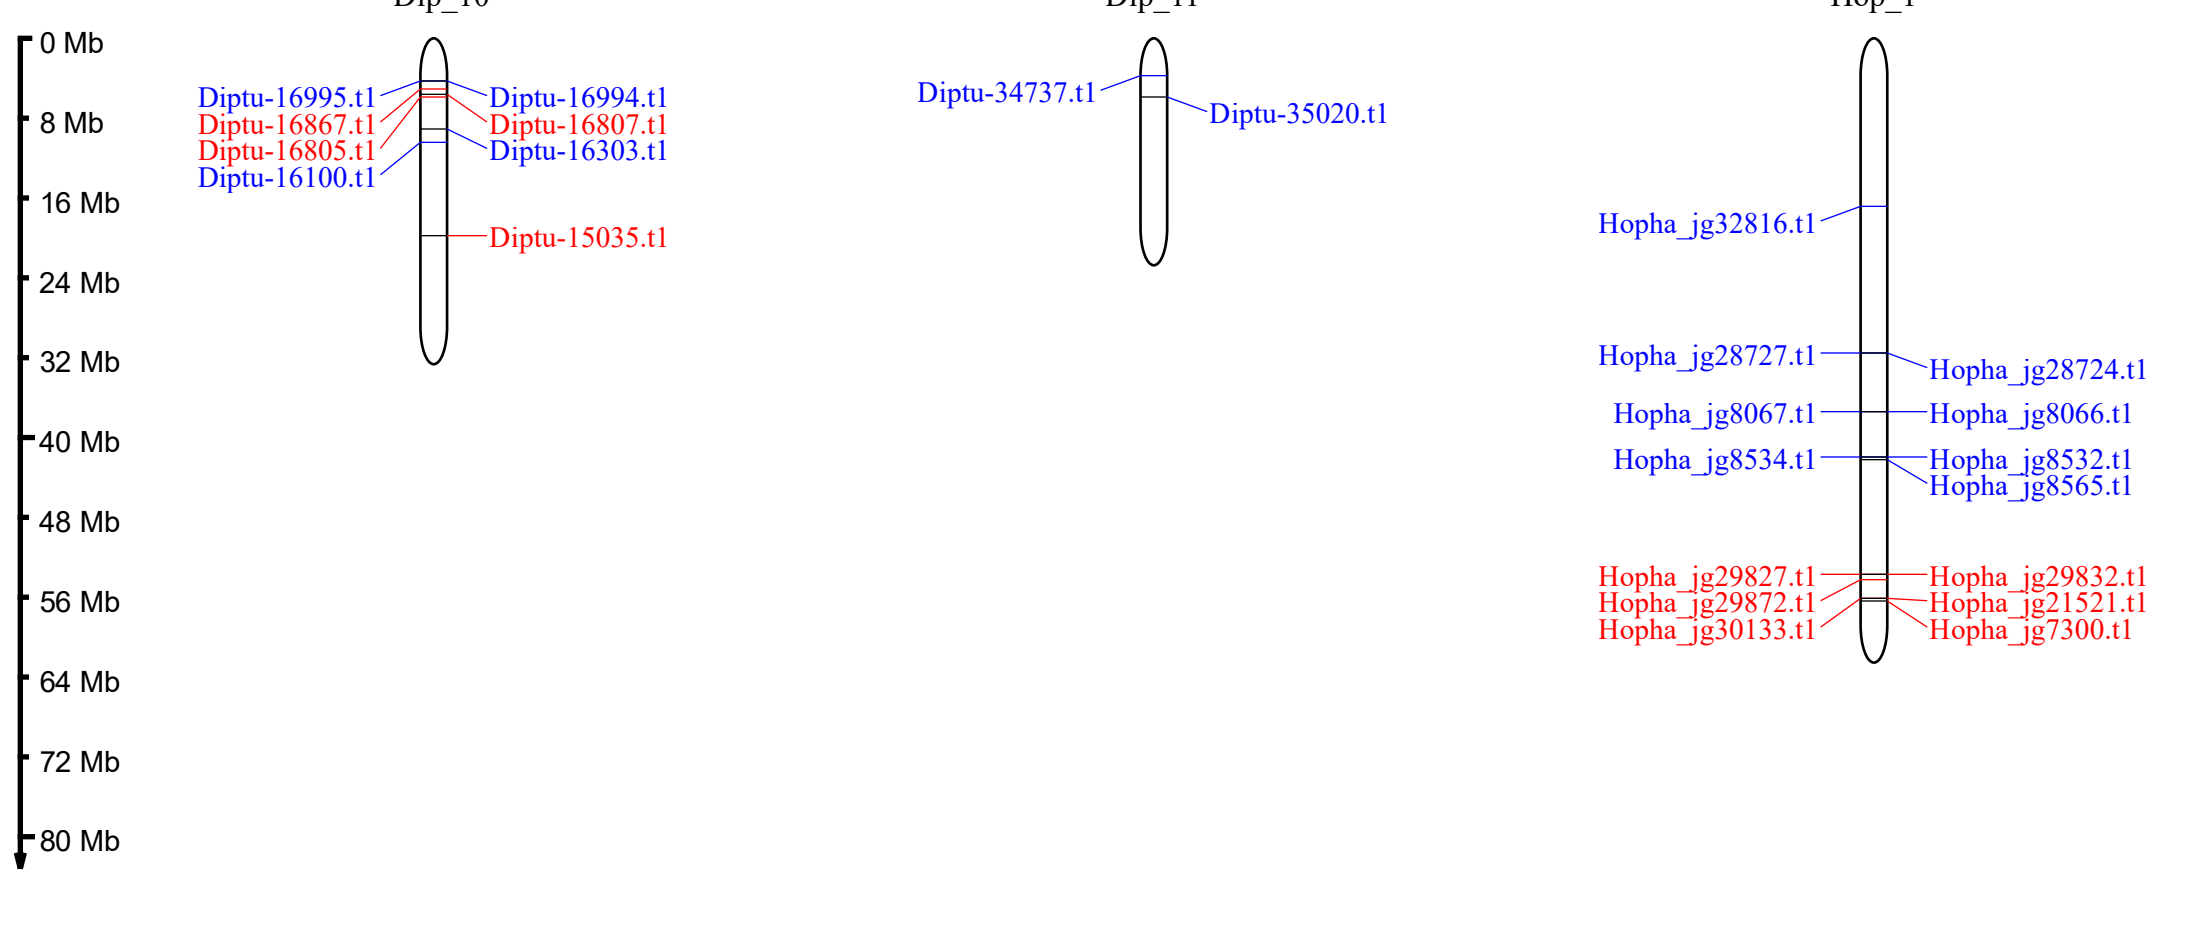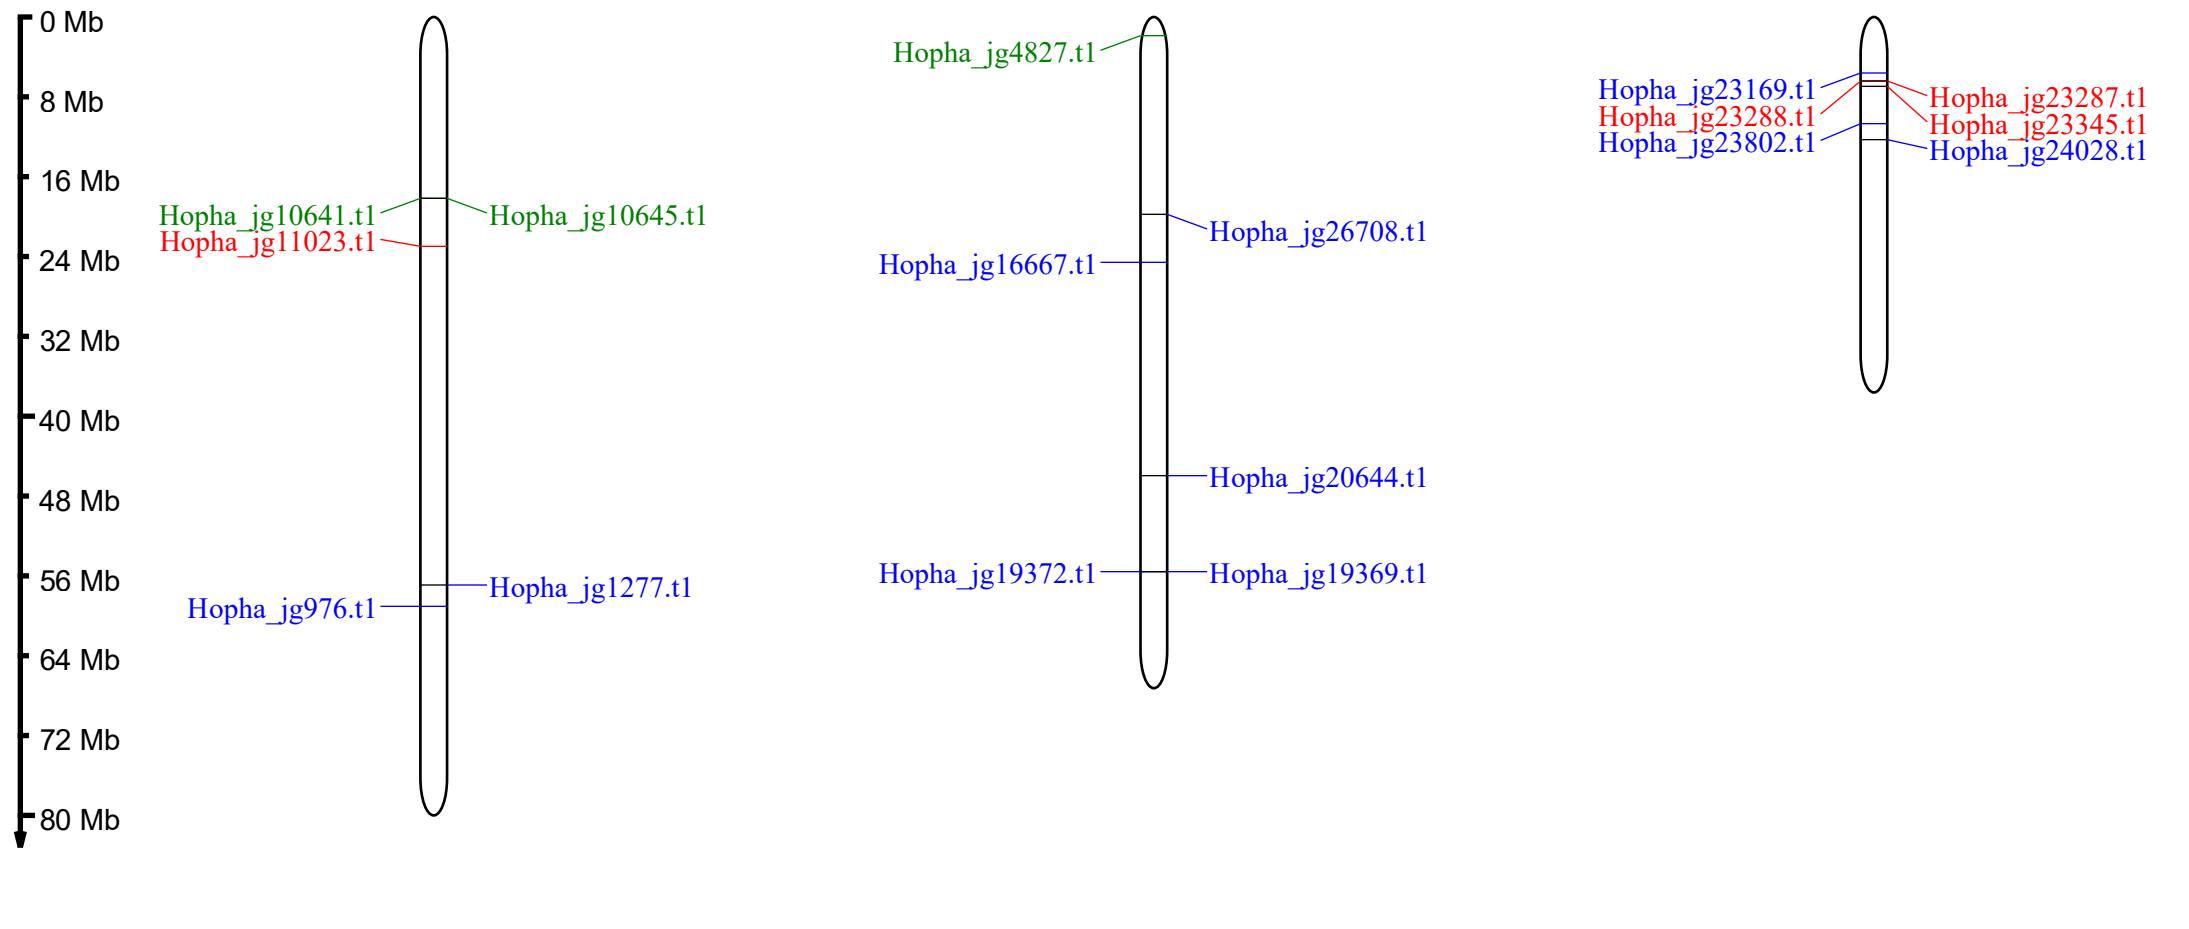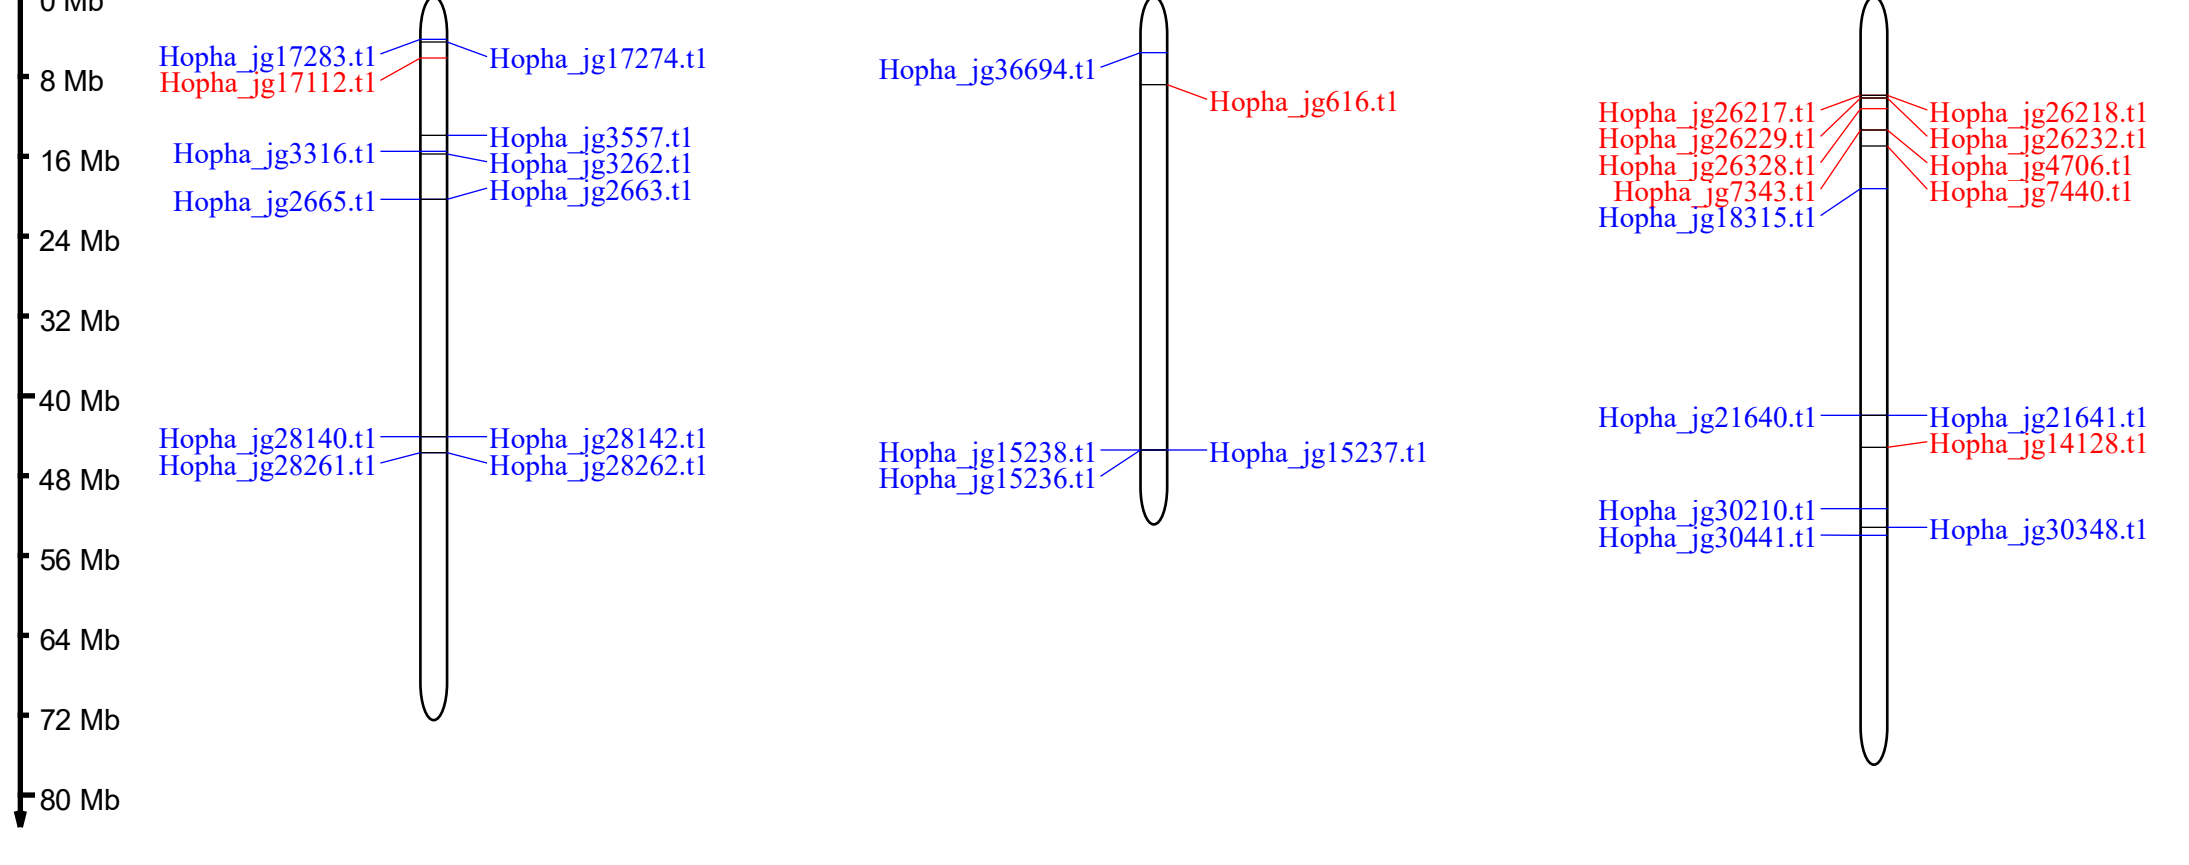

● TPS ● BAHD ● BEAT
