# Supplementary material
Source: PubMed Central journal article supplement (PMC11383816)

a.

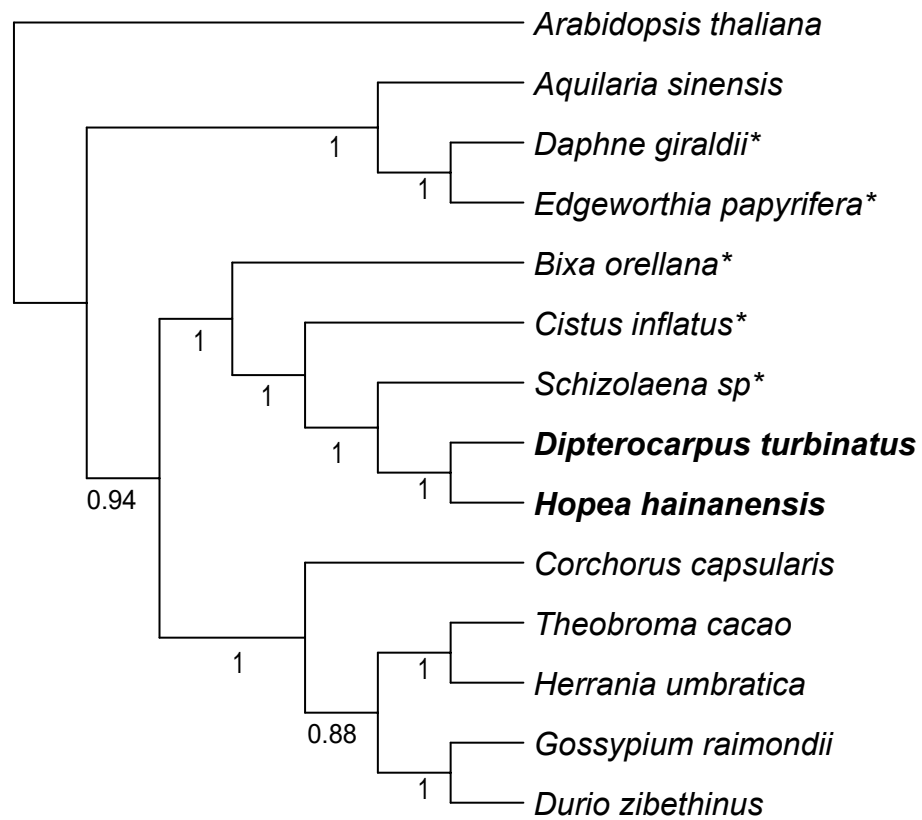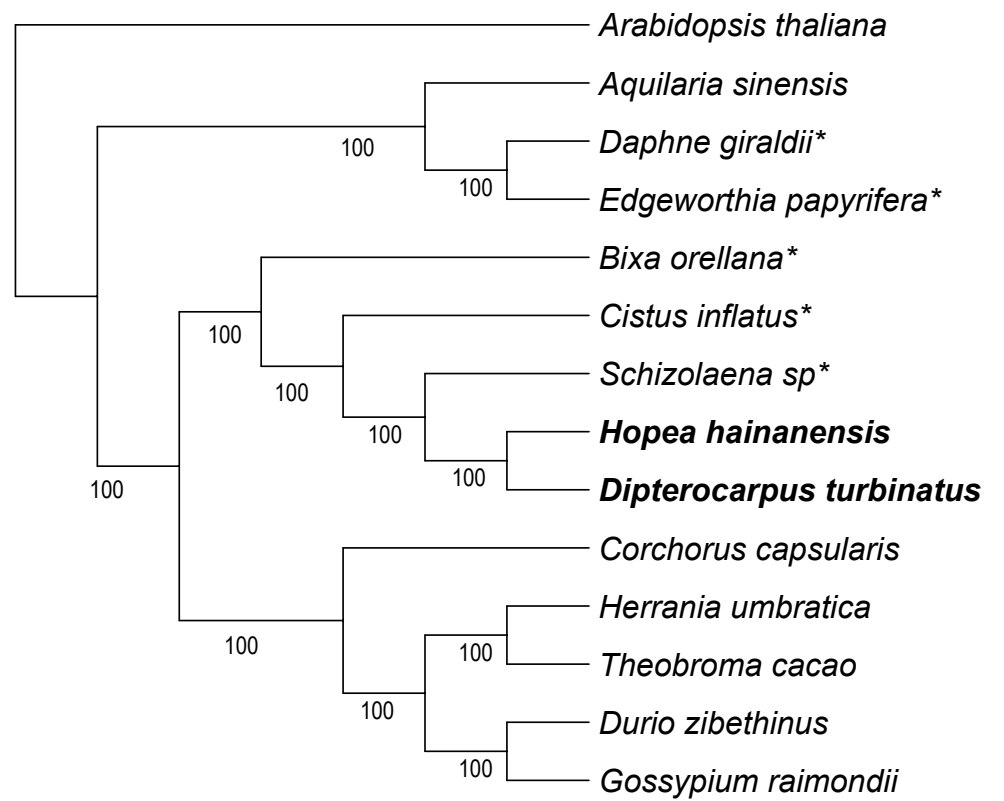

b.

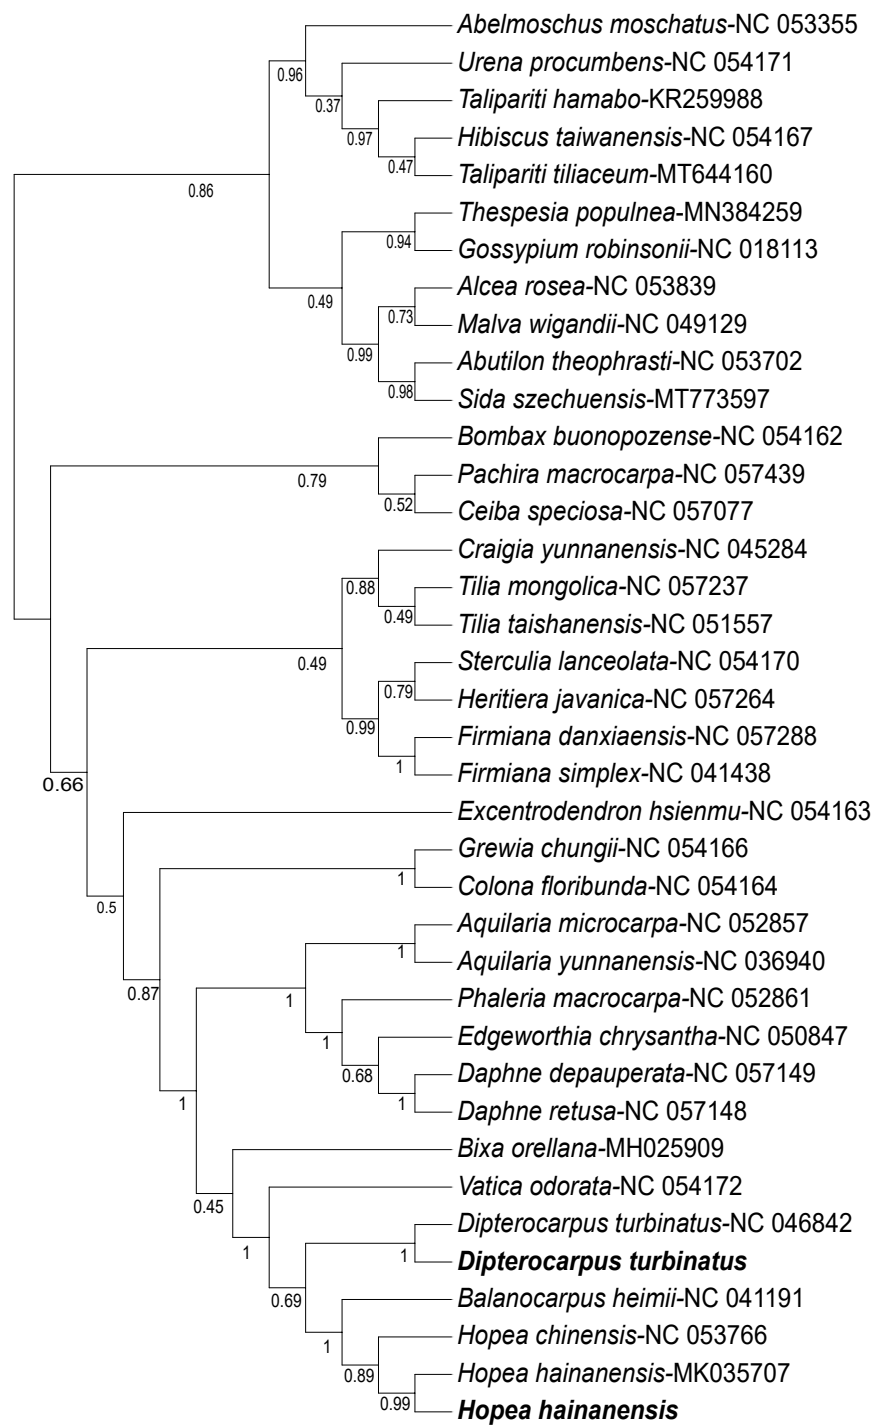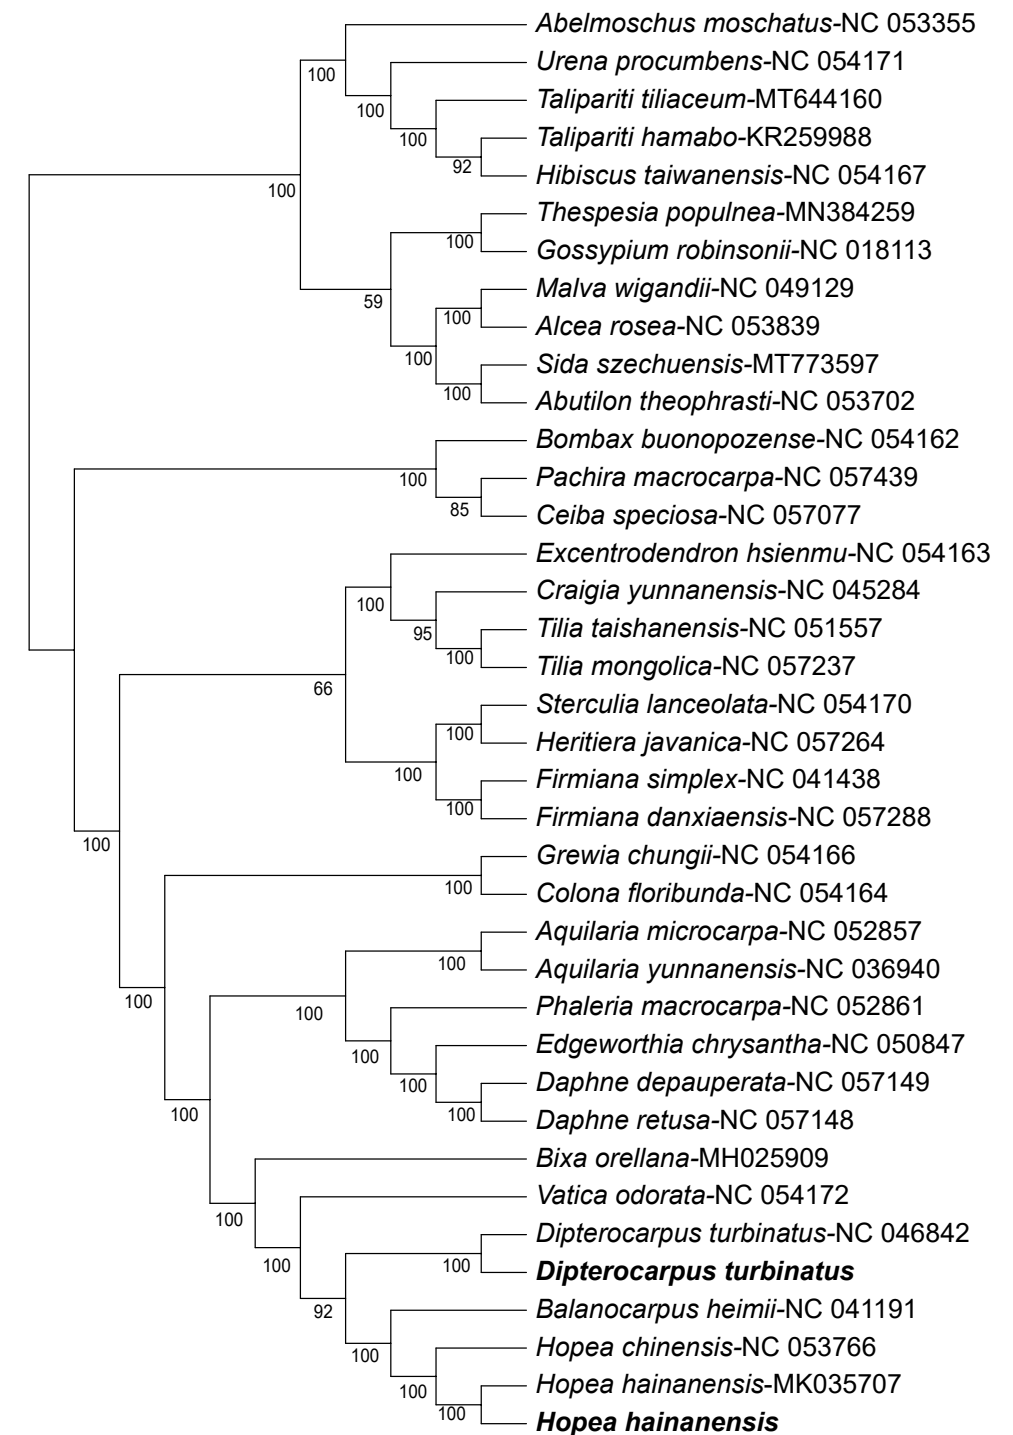

Supplement: PBI-20-538-s003.pdf [file PBI-20-538-s003.pdf]
