# Supplementary material
Source: PubMed Central journal article supplement (PMC11383816)

*D. turbinatus*

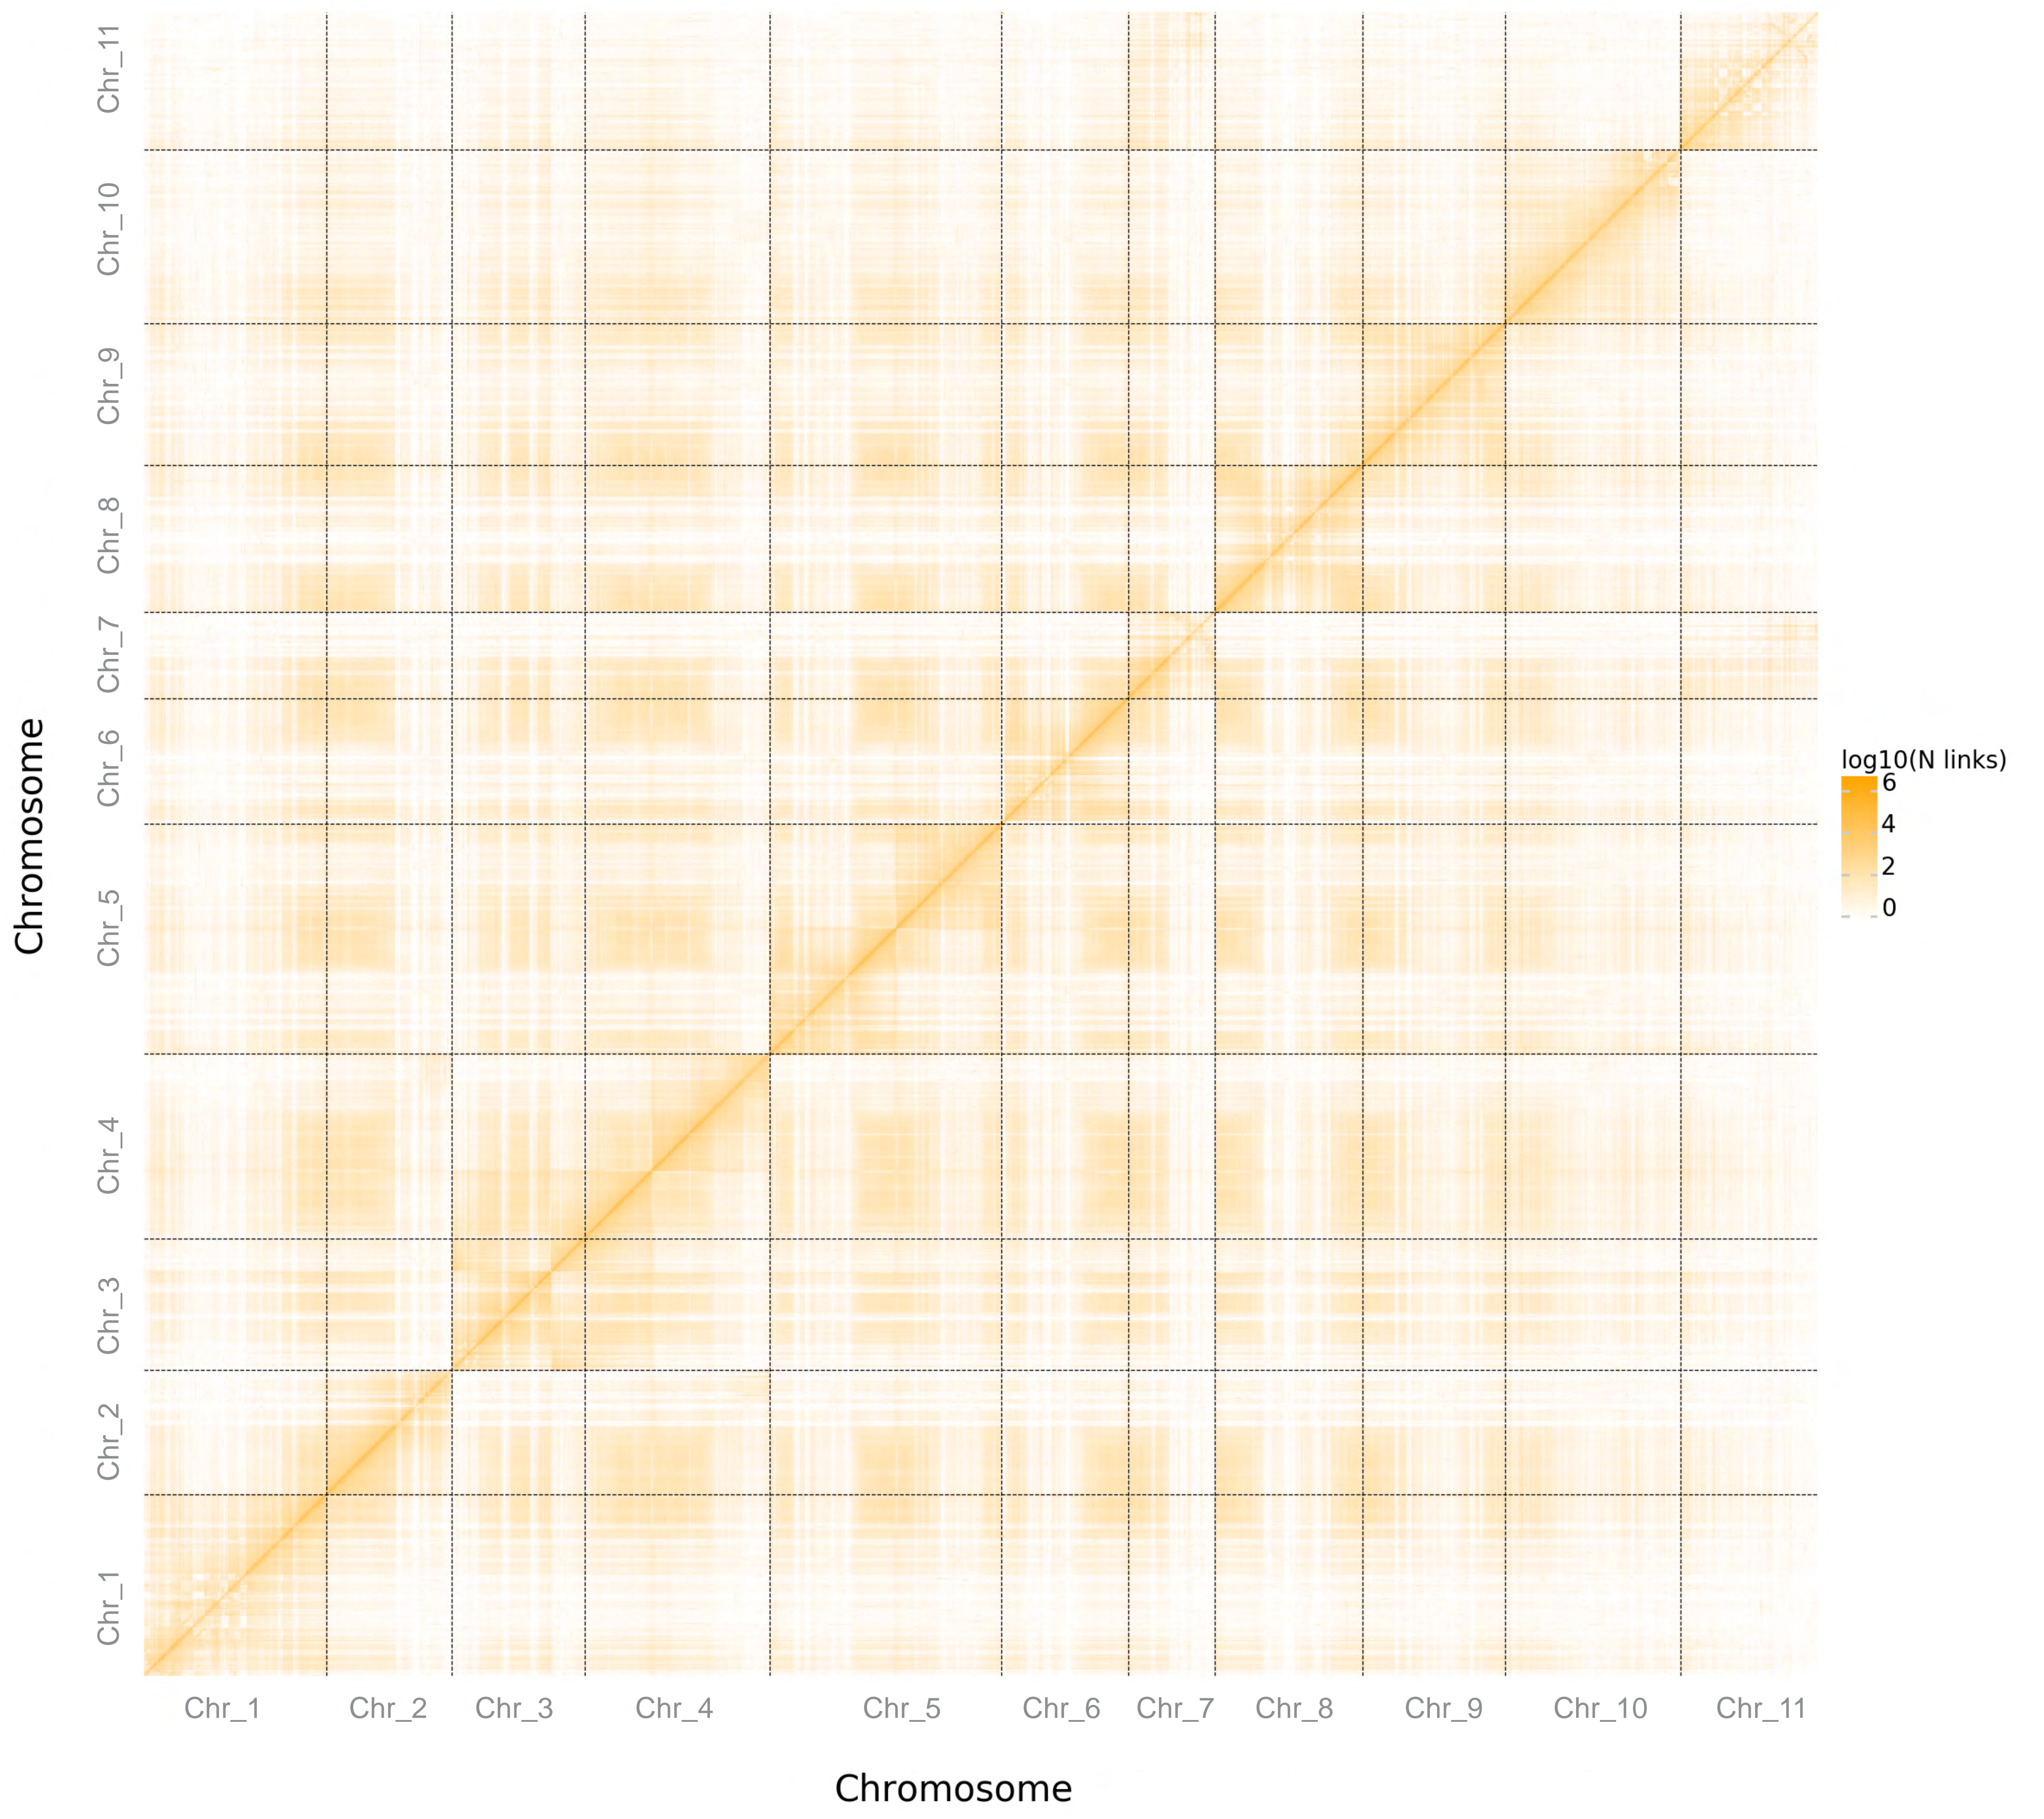

*H hainanensis*

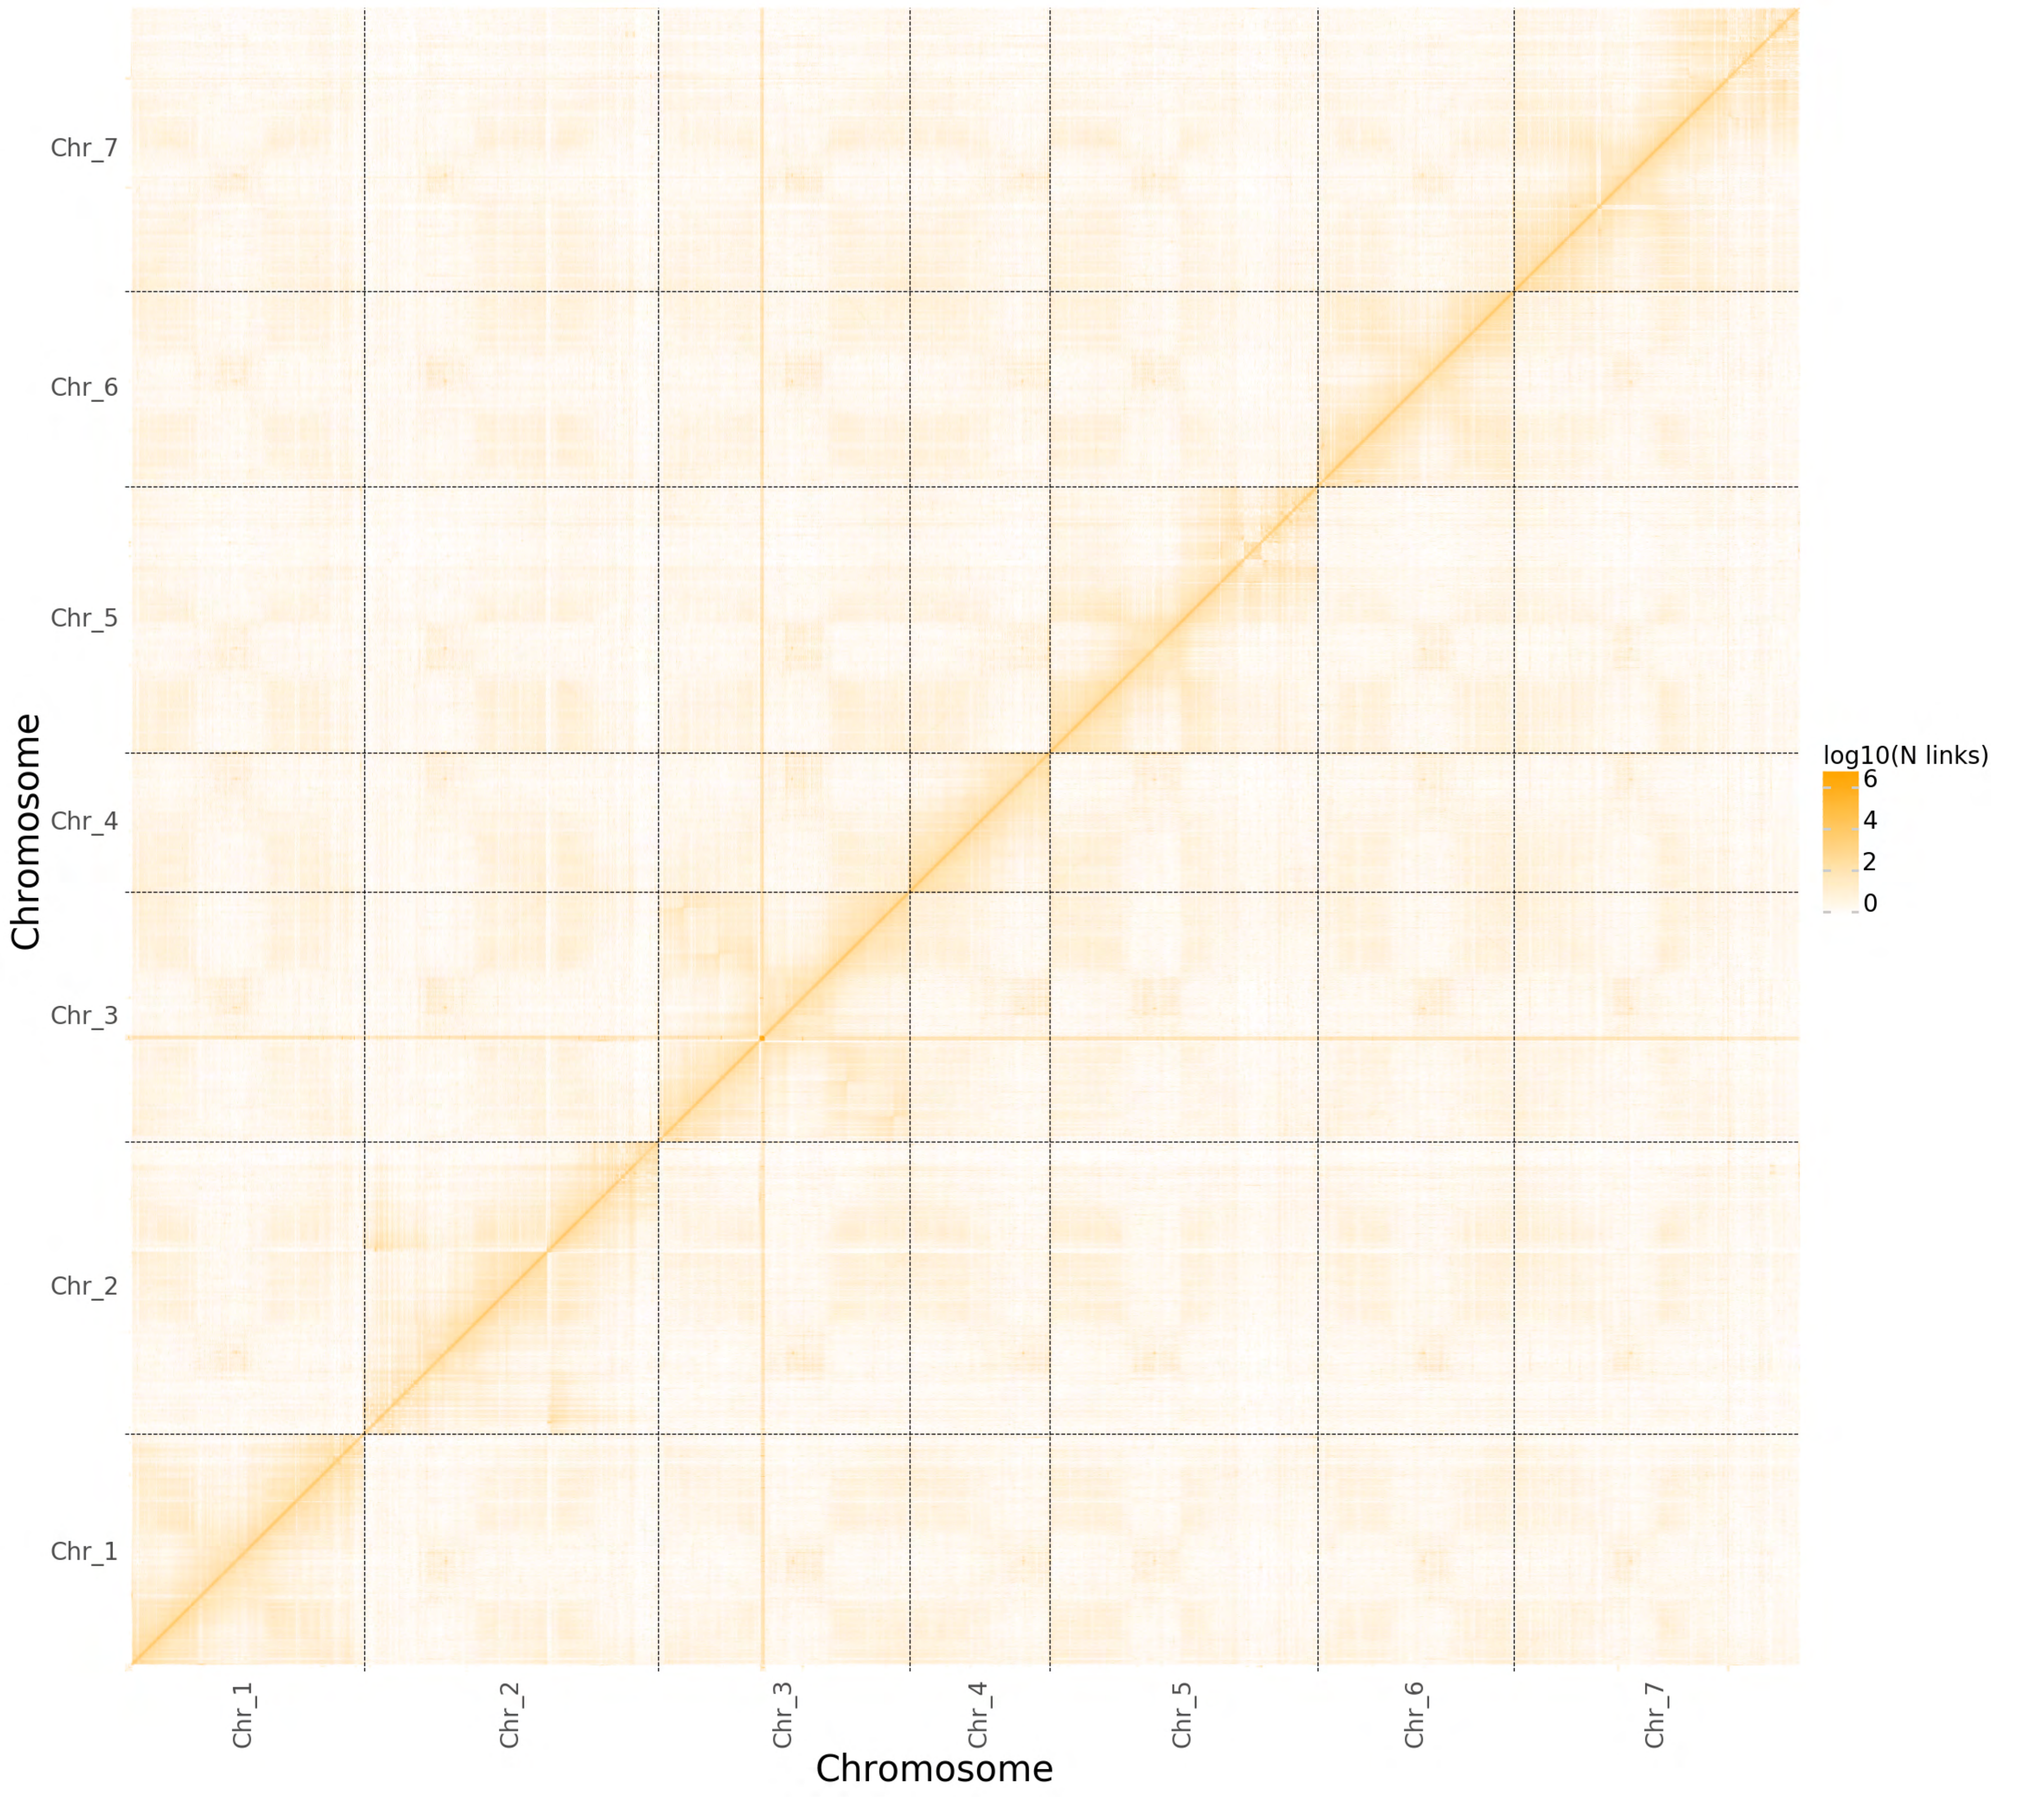

Supplement: PBI-20-538-s007.pdf [file PBI-20-538-s007.pdf]
