# Supplementary material
Source: PubMed Central journal article supplement (PMC11383816)

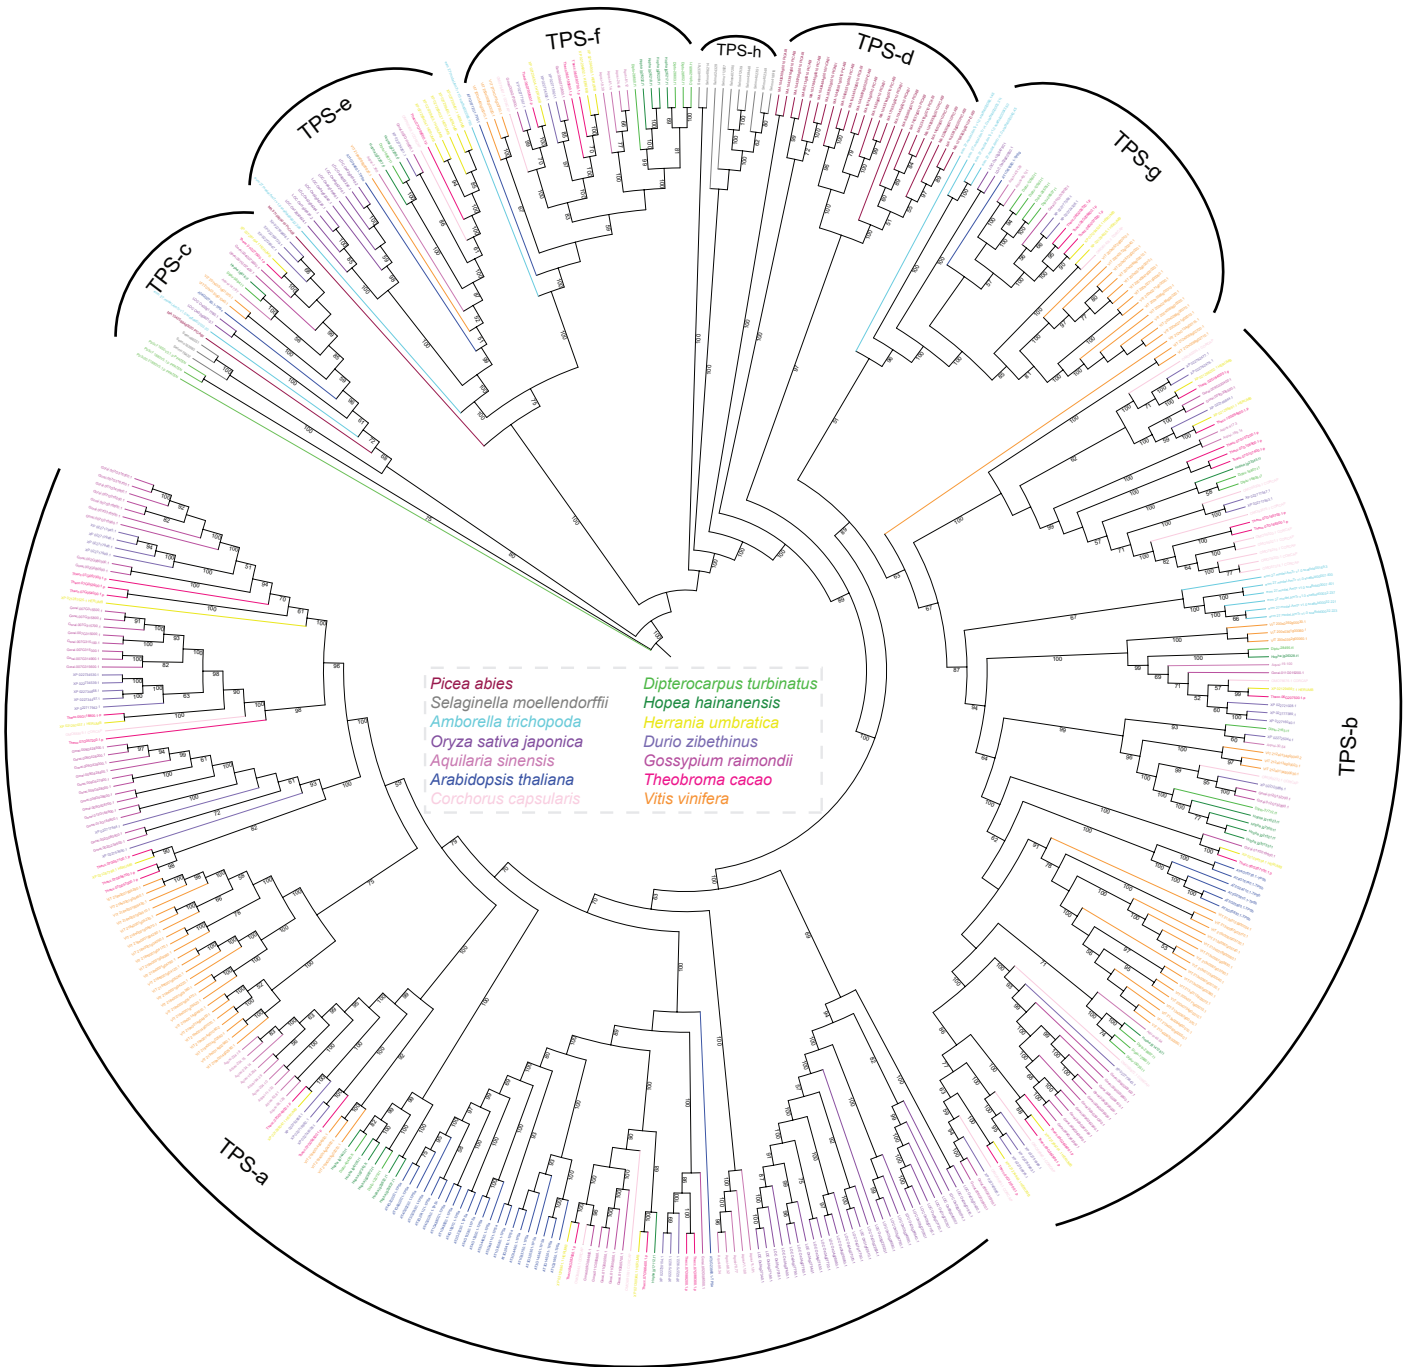

Supplement: PBI-20-538-s010.pdf [file PBI-20-538-s010.pdf]
